# Supplementary material
Source: Springer Nature journal article supplement (https://www.springermedizin.de/resource/supplementary/12939_2006_69_MOESM4_ESM.pdf/9551422)

# Overall level under-5 mortality (per 1,000 live births)

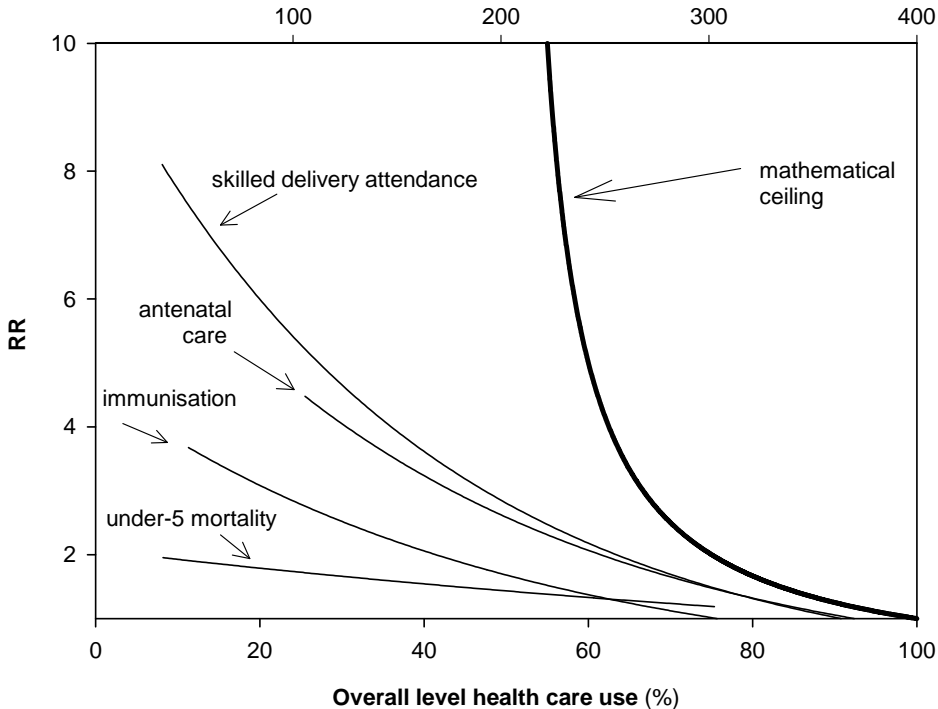

Supplement: MOESM4 [file 9551422]
